# Supplementary material for: Economic choice between remifentanil and food in squirrel monkeys
Source: PubMed Central journal article supplement (PMC9117236; doi:10.1038/s41386-021-00996-6), 2021-04-08
Supplement: 41386_2021_996_MOESM1_ESM.pdf [file 41386_2021_996_MOESM1_ESM.pdf]

**SUPPLEMENTAL MATERIAL**

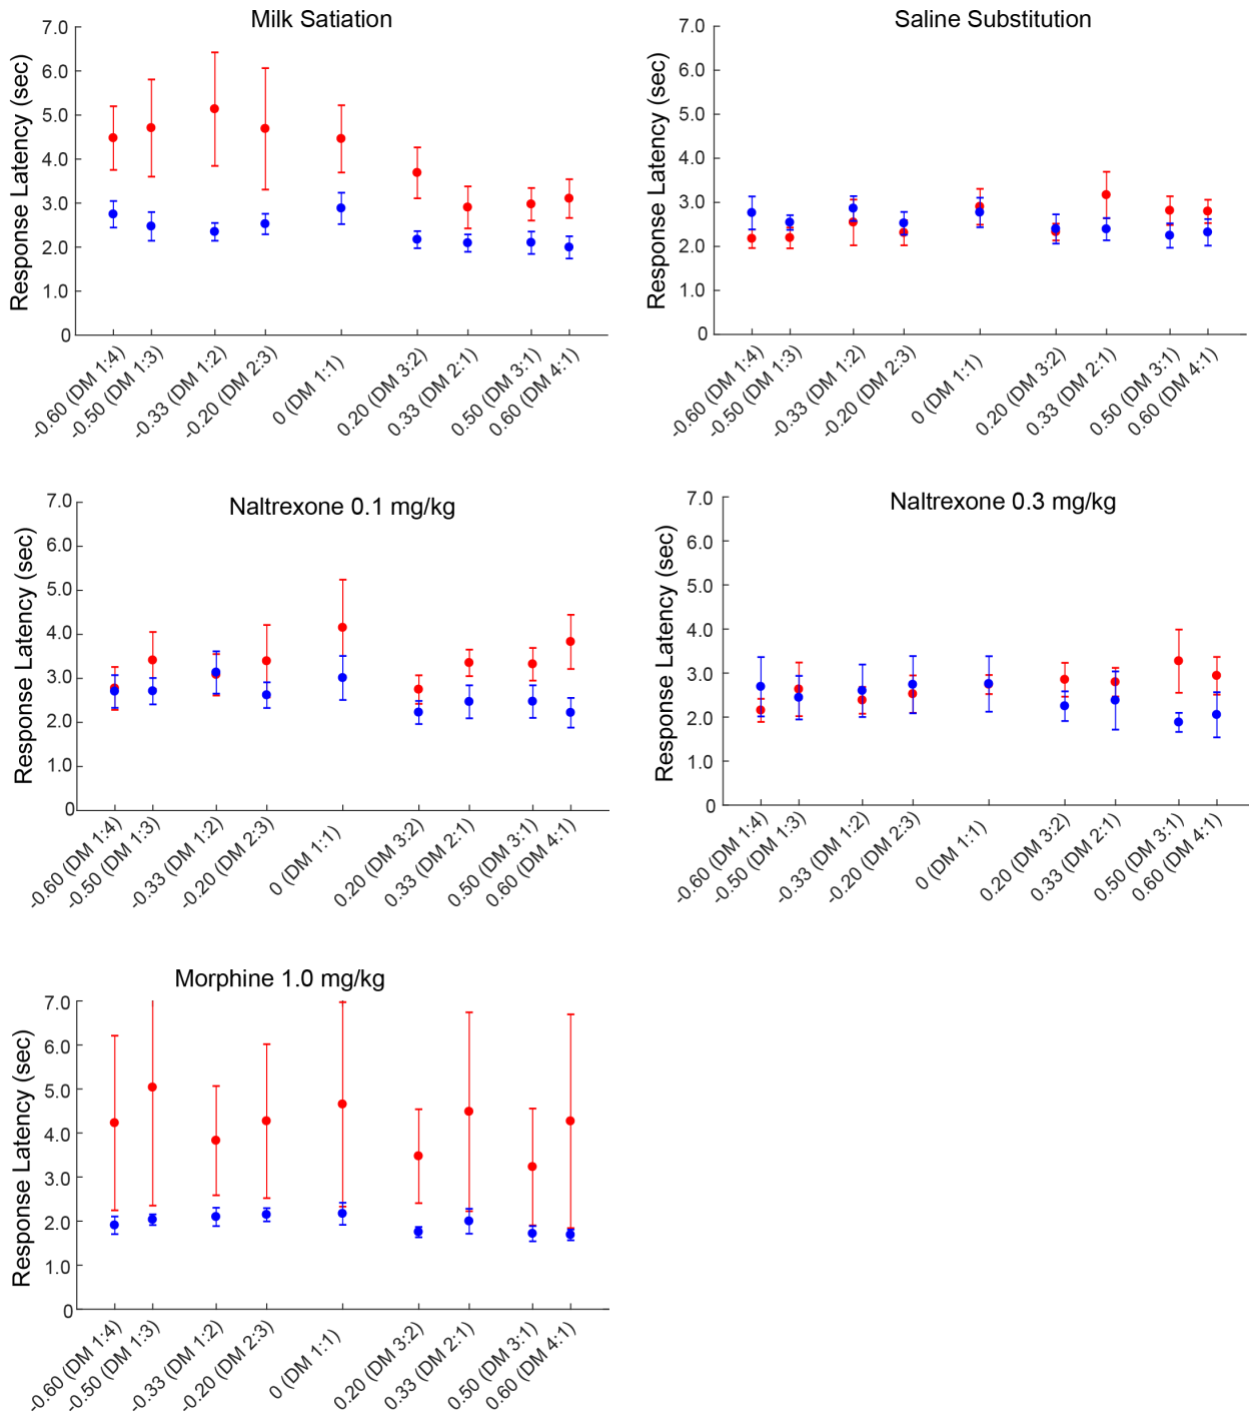

**Fig.S1.** Response latencies vs Reward Contrast for each treatment and contemporaneous baseline.

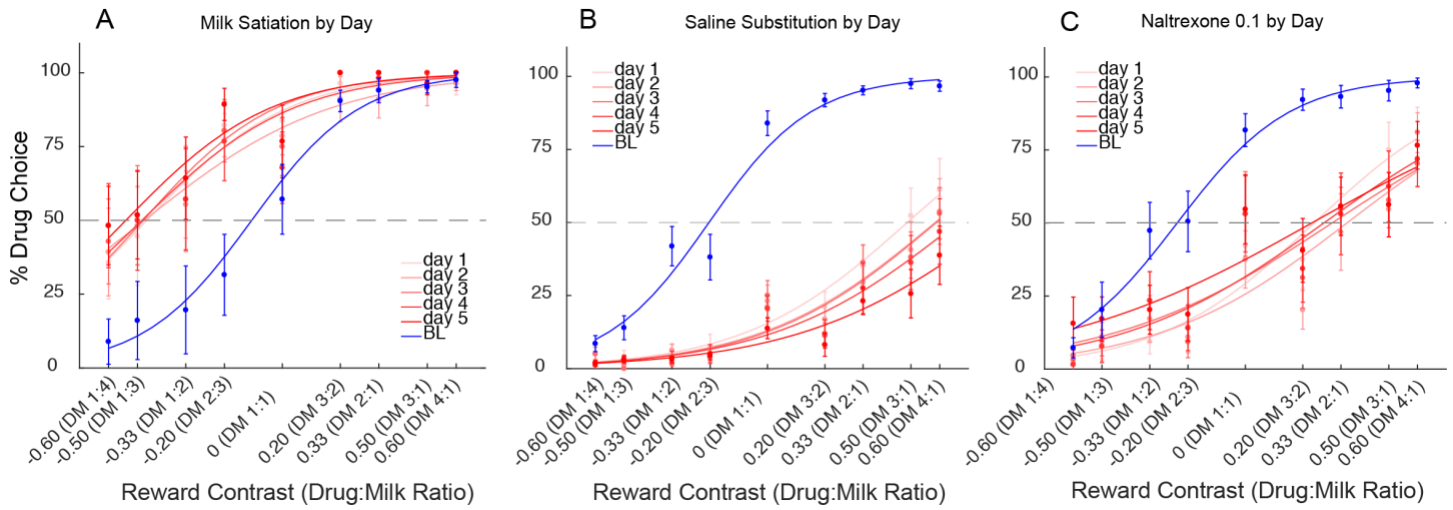

**Fig.S2.** Representative day by day treatment effects on choice. Treatments were Monday-Friday, with day 1 being Monday. **A)** Milk satiation; **B)** Saline substitution; **C)** Naltrexone pretreatment.
